# Supplementary material
Source: ML conference proceedings conference paper supplement (https://openaccess.thecvf.com/content/cvpr_2016/html/Choi_Visual_Tracking_Using_2016_CVPR_paper.html)
Supplement: Supplementary file 2 [file Choi_Visual_Tracking_Using_2016_CVPR_supplemental.zip]

Archive with 2 entries (2 files):
- supplementary_final.pdf
- OOTB_result_movie_final.avi
